# Supplementary material for: Structural basis for chemotype diversity in small molecule GLP-1 receptor agonist drug discovery
Source: Research Square preprint supplement (doi:10.21203/rs.3.rs-7597307/v1), 2025-10-12

**Table S1.** Statistics of cryo-EM data and atom model refinements

| Dataset                                   | aleniglipron-GLP-1R-Gs<br>(EMDB-64939 / PDB: 9VC1) | lotiglipron-GLP-1R-Gs<br>(EMDB-64940 / PDB: 9VC2) | compound 73-GLP-1R-Gs<br>(EMDB-64941 / PDB: 9VC3) | compound 355-GLP-1R-Gs<br>(EMDB-64942 / PDB: 9VC4) | compound 3b-GLP-1R-Gs<br>(EMDB-64943 / PDB: 9VC5) |
|-------------------------------------------|----------------------------------------------------|---------------------------------------------------|---------------------------------------------------|----------------------------------------------------|---------------------------------------------------|
| Data collection and processing            |                                                    |                                                   |                                                   |                                                    |                                                   |
| Microscope                                | Titan Krios G3i                                    | Titan Krios G3i                                   | Titan Krios G3i                                   | Titan Krios G4                                     | Titan Krios G4                                    |
| Magnification                             | 130,000                                            | 130,000                                           | 130,000                                           | 96,000                                             | 96,000                                            |
| Voltage (kV)                              | 300                                                | 300                                               | 300                                               | 300                                                | 300                                               |
| Electron exposure (e-/Å <sup>2</sup> )    | 50                                                 | 50                                                | 50                                                | 50                                                 | 50                                                |
| Defocus range (μm)                        | -0.8 to -1.8                                       | -0.8 to -1.8                                      | -0.8 to -1.8                                      | -0.8 to -1.8                                       | -0.8 to -1.8                                      |
| Pixel size (Å) (calibrated)               | 0.932                                              | 0.932                                             | 0.932                                             | 0.81                                               | 0.81                                              |
| Total exposure (e-/Å <sup>2</sup> )       | 50                                                 | 50                                                | 50                                                | 50                                                 | 50                                                |
| Symmetry imposed                          | C1                                                 | C1                                                | C1                                                | C1                                                 | C1                                                |
| Initial particle images (no.)             | 6,924,935                                          | 4,766,036                                         | 7,514,542                                         | 4,458,347                                          | 5,240,200                                         |
| Final particle images (no.)               | 657,890                                            | 1,157,699                                         | 1,390,623                                         | 256,525                                            | 425,839                                           |
| Map resolution (Å, FSC 0.143)             | 2.5                                                | 2.3                                               | 2.4                                               | 3.0                                                | 3.0                                               |
| Map resolution range (Å)                  | 2.1–3.3                                            | 1.9–3.1                                           | 2.1–3.3                                           | 2.5–3.7                                            | 2.4–3.6                                           |
| Refinement                                |                                                    |                                                   |                                                   |                                                    |                                                   |
| Initial model used (PDB code)             | 6X18                                               | 6X1A                                              | 6X18                                              | 6X1A                                               | 6X1A                                              |
| Model resolution (Å, FSC 0.5)             | 2.6                                                | 2.4                                               | 2.6                                               | 3.2                                                | 3.1                                               |
| Map sharpening B factor (Å <sup>2</sup> ) | 98.4                                               | 93.9                                              | 103.1                                             | 158.4                                              | 163.0                                             |
| Model composition                         |                                                    |                                                   |                                                   |                                                    |                                                   |
| Non-hydrogen atoms                        | 3296                                               | 3270                                              | 3253                                              | 2630                                               | 2677                                              |
| Protein residues                          | 386                                                | 390                                               | 387                                               | 312                                                | 312                                               |
| Ligands                                   | 1                                                  | 1                                                 | 1                                                 | 1                                                  | 3                                                 |
| B factors (Å <sup>2</sup> )               |                                                    |                                                   |                                                   |                                                    |                                                   |
| Protein                                   | 72.34                                              | 56.70                                             | 67.47                                             | 70.14                                              | 72.72                                             |
| ligand                                    | 37.90                                              | 29.29                                             | 35.30                                             | 79.56                                              | 90.04                                             |
| Validation                                |                                                    |                                                   |                                                   |                                                    |                                                   |
| MolProbity score                          | 1.34                                               | 0.97                                              | 1.09                                              | 1.32                                               | 1.02                                              |
| Clashscore                                | 2.19                                               | 2.03                                              | 1.75                                              | 2.69                                               | 1.31                                              |
| Poor rotamers (%)                         | 0                                                  | 0                                                 | 0                                                 | 0                                                  | 0                                                 |
| RMSD from ideal values                    |                                                    |                                                   |                                                   |                                                    |                                                   |
| Bond length (Å)                           | 0.003                                              | 0.002                                             | 0.002                                             | 0.004                                              | 0.003                                             |
| Bond angle (°)                            | 0.605                                              | 0.493                                             | 0.492                                             | 0.689                                              | 0.785                                             |
| Ramachandran plot                         |                                                    |                                                   |                                                   |                                                    |                                                   |
| Favored/allowed/outlier (%)               | 95.00                                              | 98.19                                             | 97.11                                             | 96.10                                              | 97.08                                             |
| Allowed                                   | 5.00                                               | 1.81                                              | 2.89                                              | 3.90                                               | 2.92                                              |
| Disallowed                                | 0                                                  | 0                                                 | 0                                                 | 0                                                  | 0                                                 |

**Figure S1.** Cryo-EM data imaging and processing of aleniglipron-GLP-1R:Gs complexes. (a) Flowchart for EM data processing. (d) exemplar micrograph. (c) Local resolution-filtered EM maps (consensus and receptor/ECD focused refinements) displaying local resolution ( $\text{\AA}$ ) colored from highest resolution (dark blue) to lowest resolution (red). (d) Gold standard Fourier shell correlation (FSC) curves for the final consensus maps and map validation from half maps, showing the overall nominal resolution. (e) Particle orientation distributions in the final 3D reconstruction.

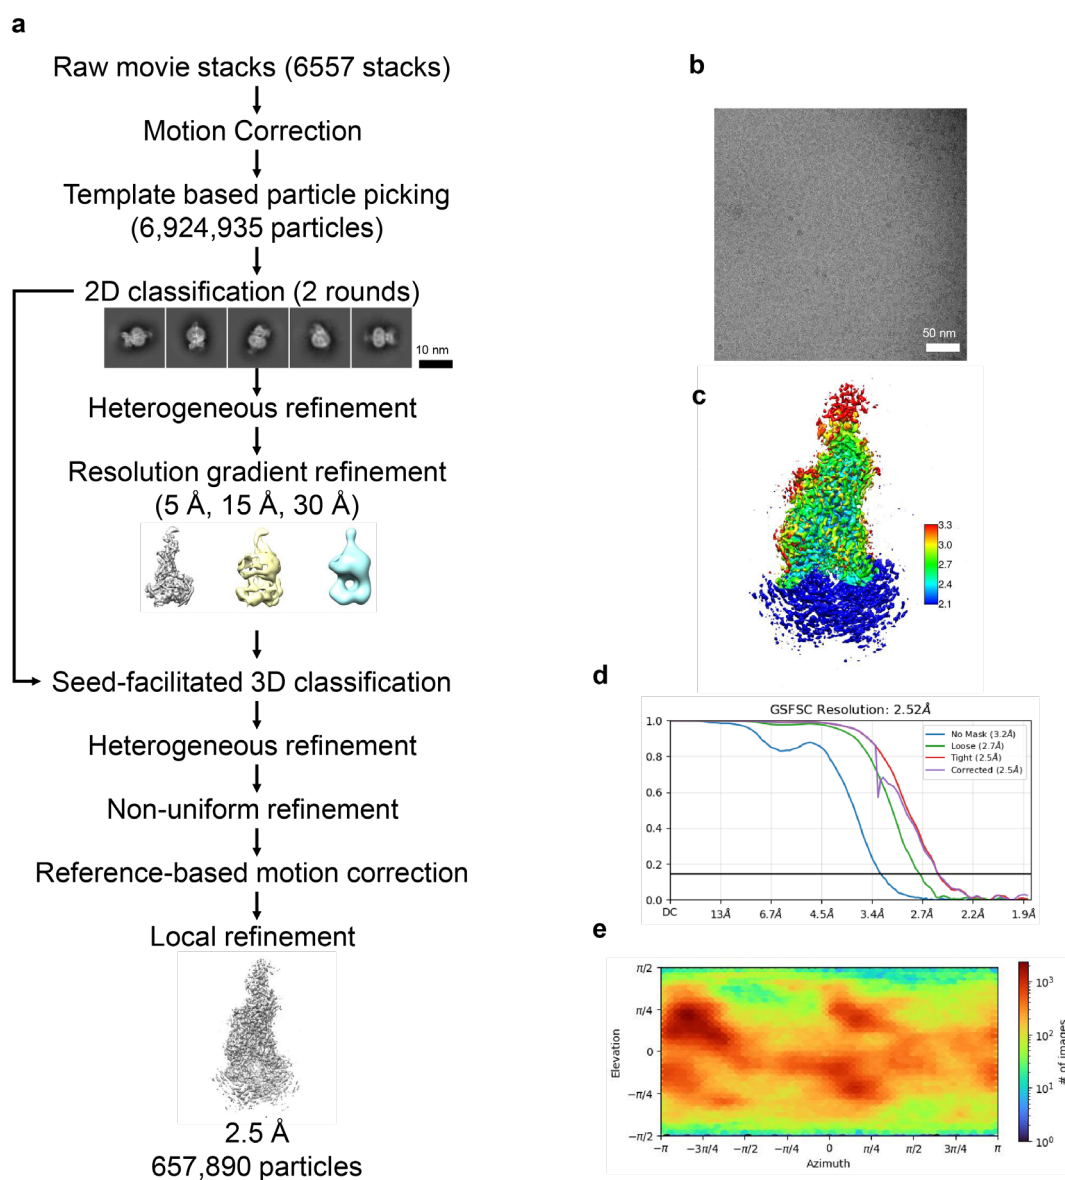

**Figure S2.** Cryo-EM data imaging and processing of lotiglipron-GLP-1R:Gs complexes. (a) Flowchart for EM data processing. (d) exemplar micrograph. (c) Local resolution-filtered EM maps (consensus and receptor/ECD focused refinements) displaying local resolution (Å) colored from highest resolution (dark blue) to lowest resolution (red). (d) Gold standard Fourier shell correlation (FSC) curves for the final consensus maps and map validation from half maps, showing the overall nominal resolution. (e) Particle orientation distributions in the final 3D reconstruction.

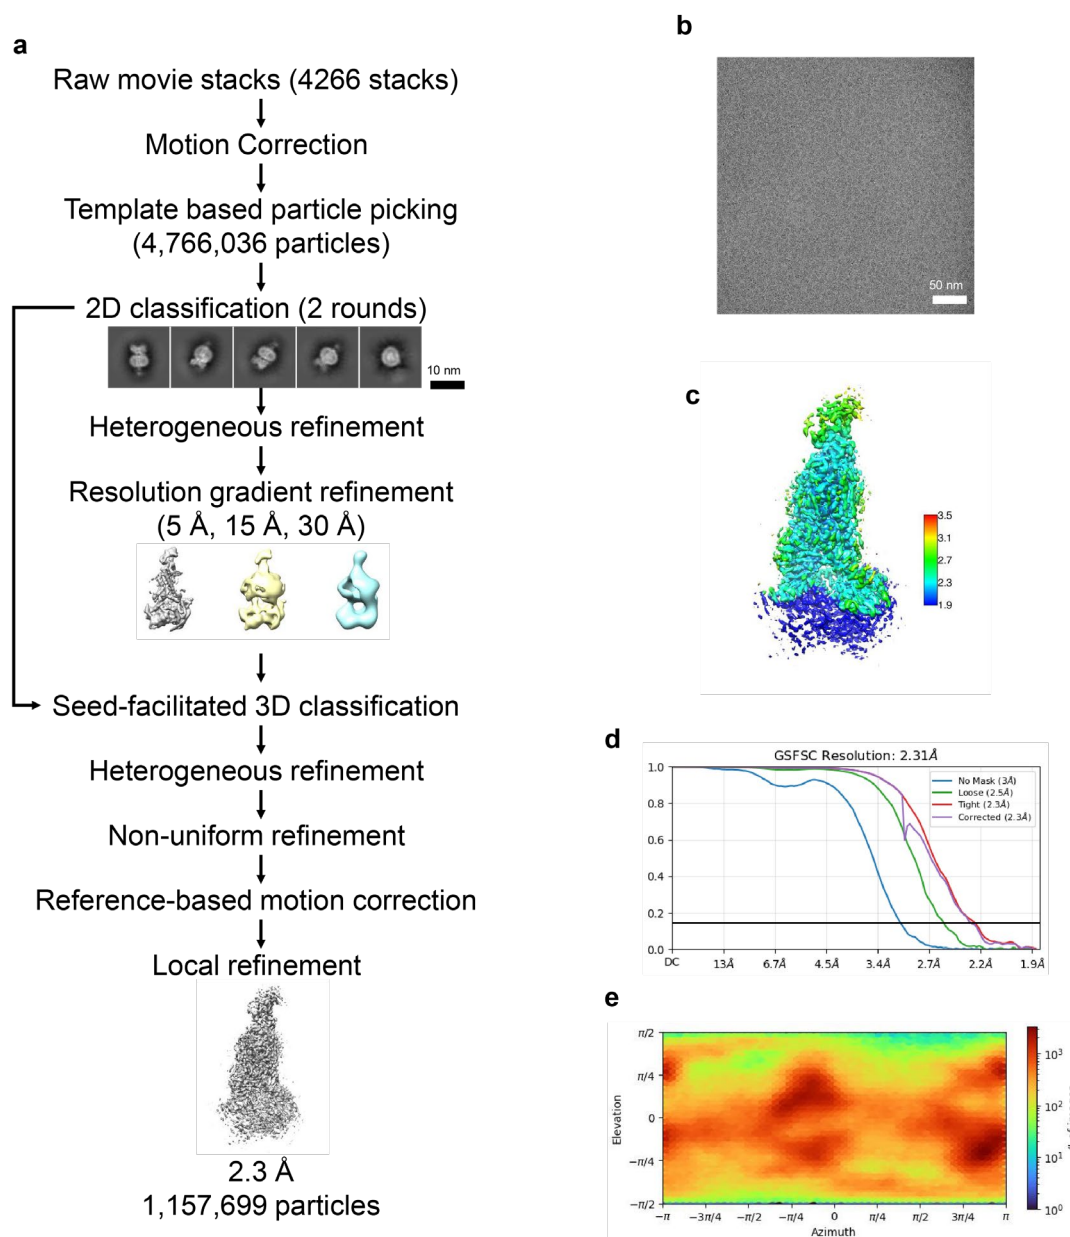

**Figure S3.** Cryo-EM data imaging and processing of compound 73-GLP-1R:Gs complexes. (a) Flowchart for EM data processing. (d) exemplar micrograph. (c) Local resolution-filtered EM maps (consensus and receptor/ECD focused refinements) displaying local resolution ( $\text{\AA}$ ) colored from highest resolution (dark blue) to lowest resolution (red). (d) Gold standard Fourier shell correlation (FSC) curves for the final consensus maps and map validation from half maps, showing the overall nominal resolution. (e) Particle orientation distributions in the final 3D reconstruction.

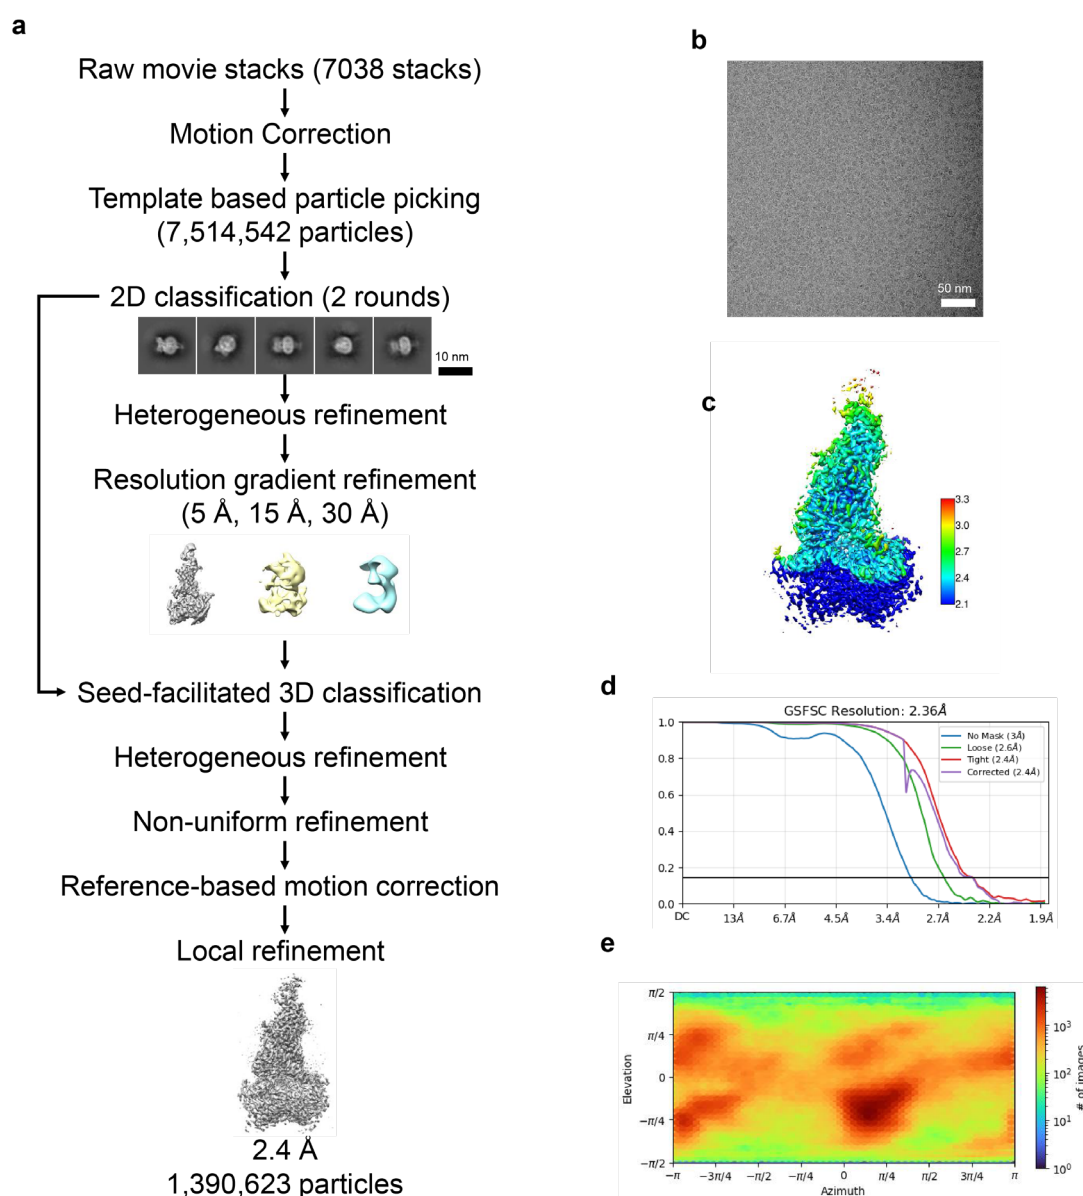

**Figure S4.** Cryo-EM data imaging and processing of compound 355-GLP-1R:Gs complexes. (a) Flowchart for EM data processing. (d) exemplar micrograph. (c) Local resolution-filtered EM maps (consensus and receptor/ECD focused refinements) displaying local resolution ( $\text{\AA}$ ) colored from highest resolution (dark blue) to lowest resolution (red). (d) Gold standard Fourier shell correlation (FSC) curves for the final consensus maps and map validation from half maps, showing the overall nominal resolution. (e) Particle orientation distributions in the final 3D reconstruction.

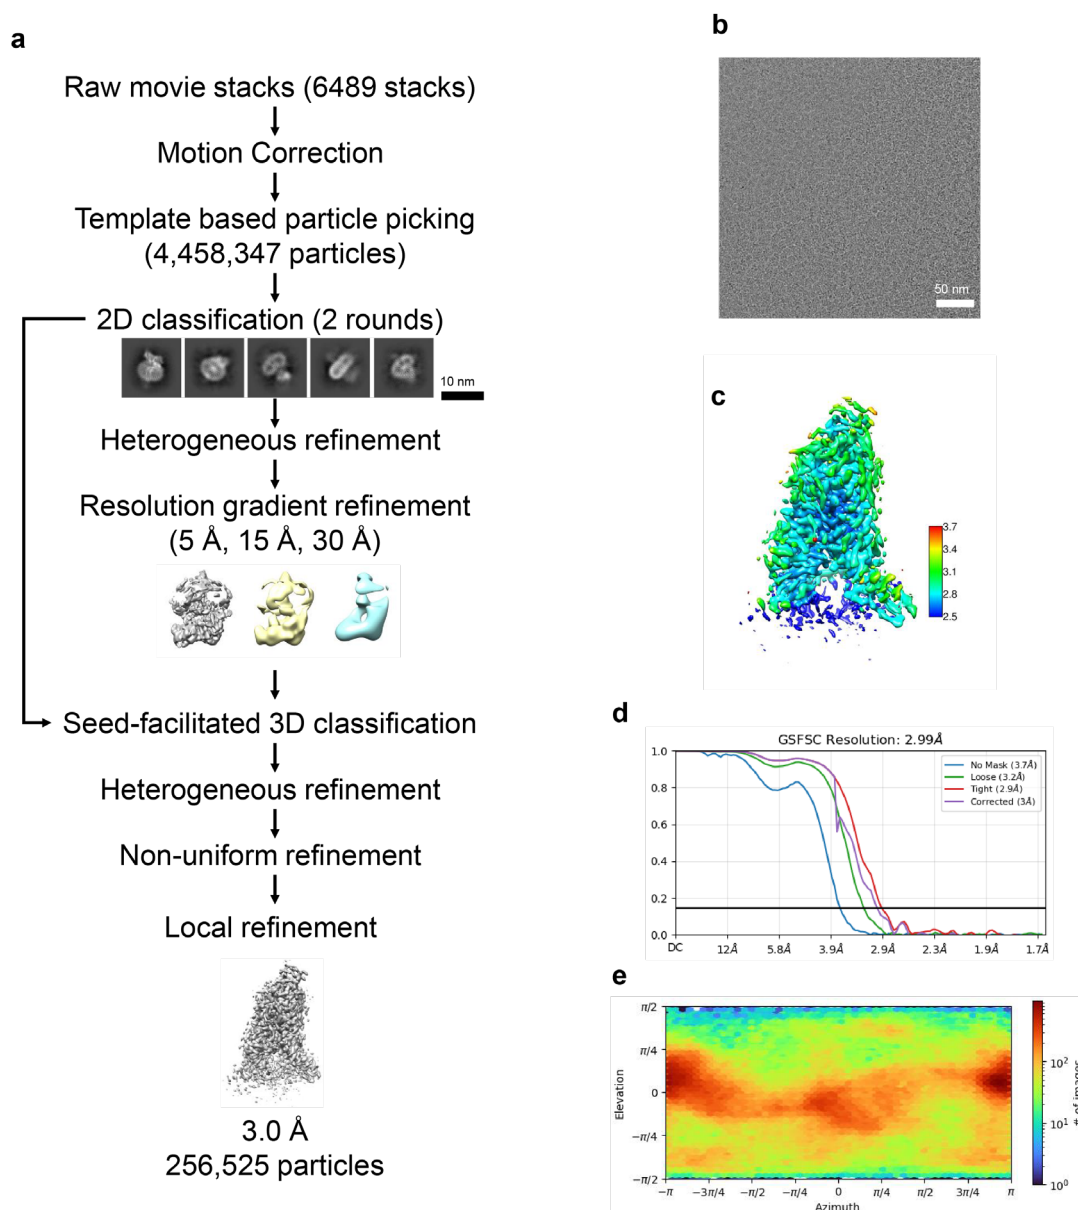

**Figure S5.** Cryo-EM data imaging and processing of compound 3b-GLP-1R:Gs complexes. (a) Flowchart for EM data processing. (d) exemplar micrograph. (c) Local resolution-filtered EM maps (consensus and receptor/ECD focused refinements) displaying local resolution (Å) colored from highest resolution (dark blue) to lowest resolution (red). (d) Gold standard Fourier shell correlation (FSC) curves for the final consensus maps and map validation from half maps, showing the overall nominal resolution. (e) Particle orientation distributions in the final 3D reconstruction.

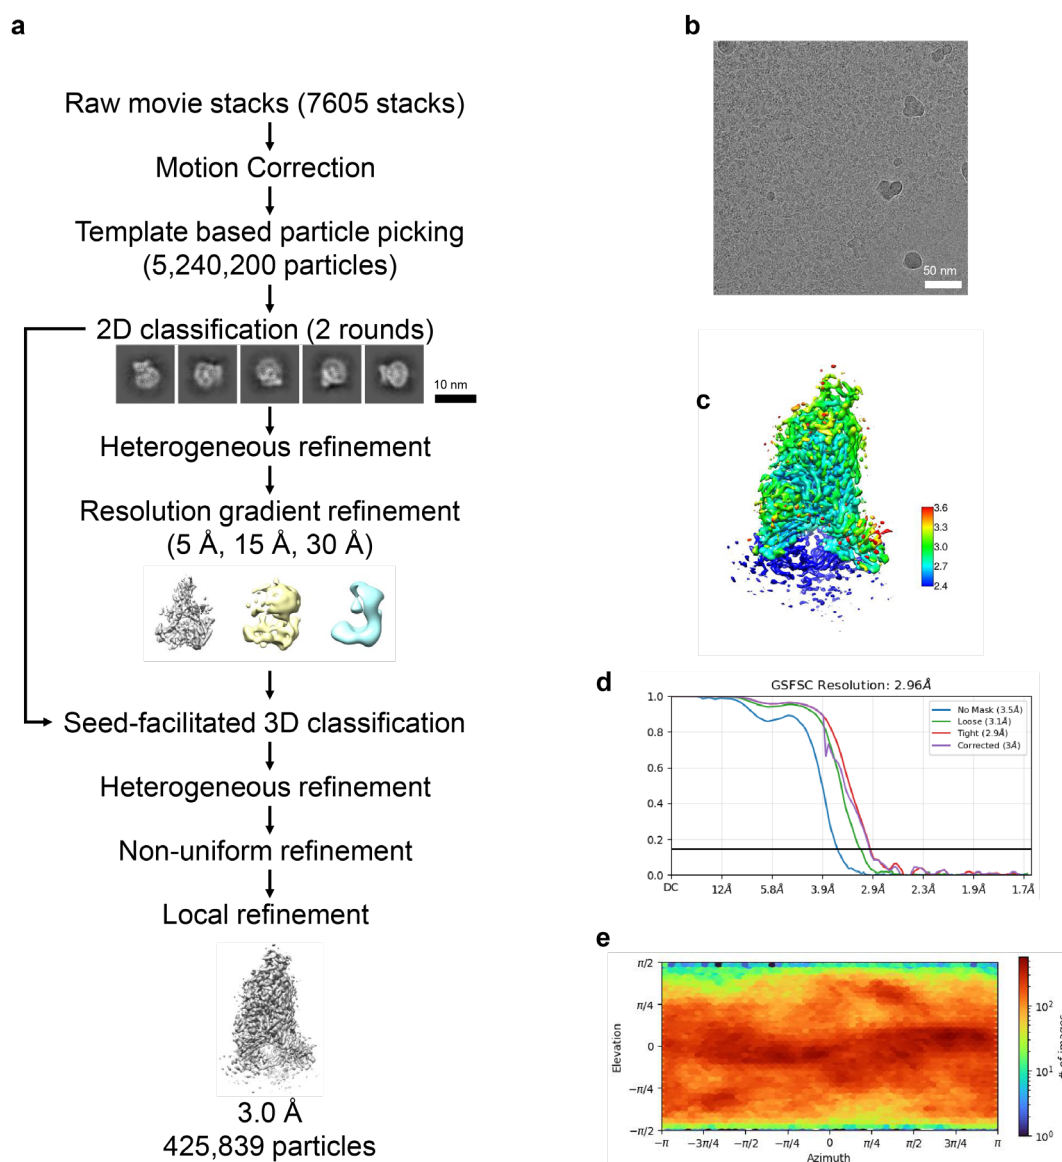

**Figure S6.** Atomic models of the ligands and receptors in the cryo-EM map. (a-e) EM density map and the model are shown for aleniglipron, lotiglipron, compound 73, compound 355, compound 3b, and all seven TM helices, and ECLs of the GLP-1R when bound to each agonist. All receptor and small molecules density was from the receptor-focused refined maps. ECL3 for compound 73 was poorly resolved and was not modelled.

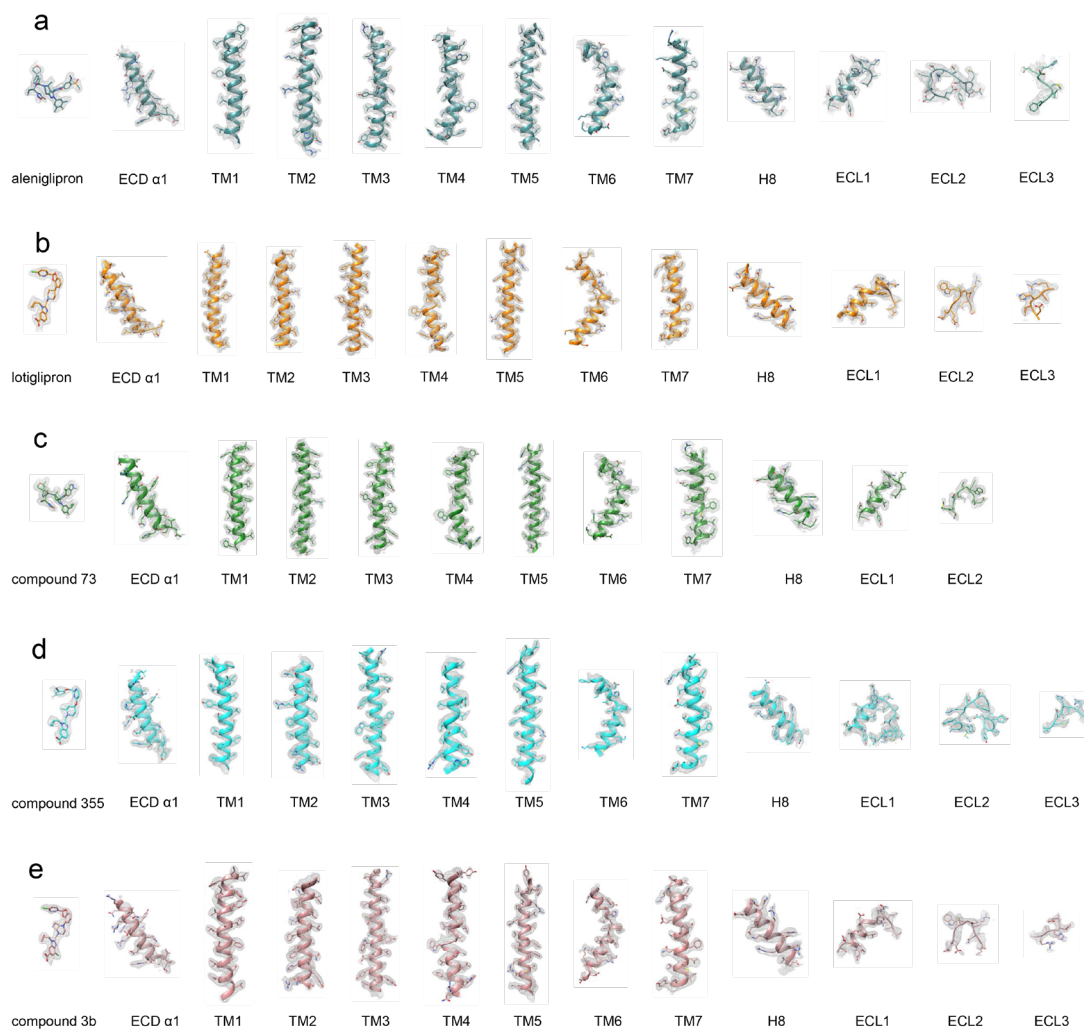

Supplement: Supplementary file 1 [file 8ddfc5c1c5f1d8361166971d.pdf]
